1 **Title page**

2 Title: Mapping The Global Landscape Of Chikungunya Rapid Diagnostic Tests: A Scoping

3 Review

4

5 Running title: Chikungunya rapid diagnostic test landscape

6

7 Authors: José Moreira<sup>1,2</sup>, Patrícia Brasil<sup>1</sup>, Sabine Dittrich<sup>3,4</sup>, André M Siqueira<sup>1</sup>

8

9 Affiliations:

10 1.Laboratório de Pesquisa Clínica em Doenças Febris Agudas, Instituto Nacional de

11 Infectologia Evandro Chagas, Fundação Oswaldo Cruz, Rio de Janeiro, Brasil

12 2. Departamento de Ensino e Pesquisa, Instituto Nacional de Cardiologia, Rio de Janeiro,

13 Brasil

14 3.Malaria & Fever department, Foundation for Innovative New Diagnostics, Switzerland,

15 Geneva

16 4. Nuffield Department of Medicine, University of Oxford, Oxford, United Kingdom

17

18 Corresponding author: José Moreira; e-mail: [jose.moreira@ini.fiocruz.br](mailto:jose.moreira@ini.fiocruz.br); telephone

19 number: +55 (21) 97035-8843; Laboratório de Pesquisa Clínica em Doenças Febris Agudas,

20 Instituto Nacional de Infectologia Evandro Chagas, Fundação Oswaldo Cruz, Av. Brasil, 4365

21 –Manguinhos, Rio de Janeiro, Brazil, CEP: 21040-360; Twitter: @j\_moreira\_

22

23 Keywords: Chikungunya; Diagnostics; Field trial; Review; Guideline; Rapid diagnostic test;

24 Fever

25

26 **Abstract**

27 **Background**

28 Chikungunya virus (CHIKV) is a re-emerging arboviral disease and represents a global health threat because of the  
29 unprecedented magnitude of its spread. Diagnostics strategies rely heavily on reverse transcriptase-polymerase chain  
30 reaction (RT-PCR) and antibody detection by Enzyme-linked Immunosorbent assay (ELISA). Rapid Diagnostic Tests (RDTs)  
31 are available and promise to decentralize testing and increase availability at lower healthcare system levels.

32 **Objectives**

33 We aim to identify the extent of research on CHIKV RDTs, map the global availability of CHIKV RDTs, and evaluate the  
34 accuracy of CHIKV RDTs for the diagnosis of CHIKV.

35 **Eligibility criteria**

36 We included studies reporting symptomatic individuals suspected of CHIKV, tested with CHIKV RDTs, against the  
37 comparator being a validated laboratory-based RT-PCR or ELISA assay. The primary outcome was the accuracy of the CHIKV  
38 RDT when compared with reference assays.

39 **Sources of evidence**

40 Medline, EMBASE, and Scopus were searched from inception to October 13<sup>th</sup>, 2021. National regulatory agencies  
41 (European Medicines Agency, U.S. Food and Drug Administration, and the Brazilian National Health Surveillance Agency)  
42 were also searched for registered CHIKV RDTs.

43 **Results**

44 Eighteen studies were included and corresponded to 3722 samples tested with RDTs between 2005-2019. The most  
45 development stage of CHIKV RDTs studies was phase I (7/18 studies) and II (7/18 studies). No studies were in phase IV. The  
46 countries that manufacturer the most CHIKV RDTs were Brazil ( $n=17$ ), followed by the USA ( $n=7$ ), and India ( $n=6$ ). Neither  
47 at EMA nor FDA, registered products were found. Conversely, the ANVISA has approved 23 CHIKV RDTs. Antibody RDTs  
48 ( $n=43$ ) predominated and demonstrated sensitivity between 20% and 100%. The sensitivity of the antigen RDTs ranged  
49 from 33.3 to 100%.

50 **Conclusions**

51 The landscape of CHIKV RDTs is fragmented and needs coordinated efforts to ensure that patients in CHIKV-endemic areas  
52 have access to appropriate RDTs. Further research is crucial to determine the impact of such tests on integrated fever case  
53 management and prescription practices for acute febrile patients.

54

55 **Keywords:** Chikungunya; Diagnostics; Field trial; Review; Guideline; Rapid diagnostic test; Fever

56

57

58 **Text**

59 **Introduction**

60 Chikungunya -a re-emerging arboviral disease caused by Chikungunya virus (CHIKV)- is  
61 transmitted by mosquitoes of the Aedes species, specifically *A. aegypti*, *A. albopictus*, and *A.*  
62 *polynesiensis* [1]. The disease is characterized by the classic triad of debilitating  
63 polyarthralgia, high-grade fever, and myalgia [1]. During the past years, we have seen an  
64 unprecedented magnitude of the disease spreading across the globe (i.e., 106  
65 countries/territories reported autochthonous or travel-related transmission), affecting  
66 millions of people in the Americas, Asia, the Indian subcontinent, Europe, and in the Pacific  
67 islands [2].

68 One of the challenges imposed by CHIKV has been the correct identification of suspected  
69 individuals in the context of co-circulation of other arboviruses that present similarly in  
70 tropical regions [3]. Laboratory diagnosis has been mainly focused on either RNA or virus-  
71 specific antibody detection through RT-PCR and ELISA technique, respectively. However,  
72 such diagnostic technologies require complex instrumentation and are not easy to perform  
73 outside sophisticated laboratories in urban settings where trained personnel are available.  
74 Therefore, these tests are not accessible or affordable to patients at the lower healthcare  
75 system levels, where most CHIKV outbreaks occur. In contrast, rapid diagnostic tests (RDTs)  
76 promise to overcome some of these challenges by bridging many gaps along the diagnostic  
77 test pathway in CHIKV-endemic areas.

78 RDTs have become available for detecting CHIKV and are reported to have variable  
79 performance and operational characteristics [4–6]. Much remains unknown regarding how

80 these tests increase the efficiency of the health systems if introduced appropriately, how  
81 acceptable they are for patients and health care providers, and how cost-effective they are,  
82 given the poor state of many countries' economies primarily impacted by CHIKV. Thus, we  
83 aim to (i) identify the extent of research on CHIKV RDTs; (ii) provide a comprehensive  
84 landscape of CHIKV RDTs available globally; (iii) evaluate the performance of CHIKV RDTs for  
85 the diagnosis of CHIKV in symptomatic individuals when compared with a reference  
86 standard, and (iv) identify knowledge gaps and further research related to CHIKV RDTs.

## 87 **Methods**

88 We followed the PRISMA Extension for Scoping Reviews (Prisma-ScR) guidance from the  
89 EQUATOR (Enhancing the QUALity and Transparency Of health Research) Network [7]. The  
90 Prisma-ScR checklist is available in the Supplementary material.

## 91 **Eligibility criteria**

92 Search terms were based on a PICO (population, intervention, comparator, and outcome)  
93 framework. The population encompassed symptomatic febrile individuals suspected of  
94 CHIKV infection. The intervention used CHIKV RDTs, either in developmental or  
95 commercially available, to diagnose CHIKV infection, with the comparator being a validated  
96 laboratory-based RT-PCR or ELISA assay. The primary outcome was the accuracy of the  
97 CHIKV RDT when compared with reference assays.

98 Articles were excluded if (i) the studies were reviews, case reports, or opinion articles; (ii)  
99 the studies evaluated the performance of reverse transcription loop-mediated isothermal  
100 amplification (RT-LAMP) assays; (iii) the studies were related to an outbreak investigation  
101 without the evaluation of the accuracy of CHIKV RDTs; (iv) the studies used an inappropriate  
102 study population (asymptomatic individuals); (v) the studies described inappropriate

103 reference assays to assign true positive/true negative status to study samples; and (vi)  
104 studies that were related to other arboviruses.

### 105 **Operational definitions**

- 106 • CHIKV RDT was defined as a rapid ( $\leq 60$  min) point-of-care (POC) assay that requires  
107 minimal instrumentation to provide actionable results.
- 108 • We classified the stage of CHIKV RDT assay development in four phases: phase I,  
109 which consist of the prototype evaluation process; phase II evaluation under ideal  
110 conditions using convenience or archived samples; phase III evaluations under ideal  
111 conditions assessing the performance and operation characteristics of the index test  
112 in a target population; and phase IV which are assessments of the impact of  
113 diagnostics on the prevalence of infection, the incidence of infection, or incidence of  
114 complications.

### 115 **Information sources**

116 Medline, EMBASE, and Scopus electronic databases were searched from inception to 13  
117 October 2021 to identify relevant publications in peer-reviewed journals as original scientific  
118 research. Additional studies were identified through manual searches of the reference lists  
119 of identified papers. The electronic database search was supplemented by searching at  
120 major tropical medicine conference abstracts repositories and the manufacturer's official  
121 website to seek relevant unpublished reports. The final search results were exported into  
122 Mendeley to manage citations identified.

123 In order to provide a comprehensive assessment of diagnostic products that are in the  
124 developmental phase and commercialization, we conducted searches in national regulatory  
125 agencies (i.e., European Medicines Agency, U.S. Food and Drug Administration, and the

126 Brazilian National Health Surveillance Agency) websites looking for registered CHIKV RDTs  
127 and a free search through the Google search engine.

### 128 **Search**

129 The search in Medline was performed using the following terms: (chikungunya OR  
130 “chikungunya virus” OR “chikungunya fever”) AND (“rapid diagnostic test” OR “rapid test”).

131 There was no language or time restriction. After deleting duplicates, the literature review  
132 group systematically screened the title, abstract and full text of each study’s inclusion and  
133 exclusion criteria.

### 134 **Data charting process**

135 Data were extracted independently from the selected studies by two authors and recorded  
136 into a standard form designed for this study. Discrepancies were resolved by mediation and  
137 discussion with other reviewers if needed. The standardized data abstraction tool captured  
138 the relevant information on key study characteristics and detailed information on all metrics  
139 used to estimate the accuracy of the CHIKV RDTs. Key variables that were systematically  
140 extracted include the year of investigation, geographical location, study design, type of RDT  
141 assay, time of illness onset to testing, reference assay, sample size, and diagnostic accuracy  
142 parameters (if available). If a study evaluated more than one RDT assay, we extracted the  
143 data related to each assay type. When articles did not provide sufficient information on  
144 relevant data, we contacted the authors via email for additional information.

### 145 **Critical appraisal of individual sources of evidence**

146 The quality of each diagnostic accuracy study was assessed following QUADAS-2 guidelines  
147 [8].

### 148 **Synthesis of results**

149 Data from all studies were aggregated, and frequency statistics were run to describe the  
150 population across all studies. Tableau Desktop Professional Edition (Tableau software, LLC,  
151 version 2021.1.0, Seattle, Washington, US) and GraphPad Prism (GraphPad Software,  
152 version 8.0, San Diego, California, U.S.) were used to represent the evidence visually.

## 153 **Results**

### 154 **Search results**

155 The initial search identified 271 potential studies for evaluation (Supplementary Figure 1).  
156 After duplicates were removed, a total of 185 citations were identified from searches of  
157 electronic databases. Based on the title and the abstract, 96 were excluded, with 89 full-text  
158 articles retrieved and assessed for eligibility. The remaining 18 studies were considered  
159 eligible for this review (all apart from one reported diagnostic accuracy metric).

### 160 **Description of studies**

161 A summary of the included studies is shown in Table 1. The main countries where the  
162 CHIKV patients were sourced were India (3/18 studies, 16.6%), Thailand (3/18 studies,  
163 16.6%), Indonesia (2/18 studies, 11.1%), and Aruba (2/18 studies, 11.1%) [Supplementary  
164 Figure 2]. CHIKV RDTs studies were phase I (7/18 studies, 38.8%) and II (7/18 studies, 38.8%)  
165 in most included studies. Three studies were phase III [4,9]. No study was phase IV. Sample  
166 recruitment used case-control methodologies (13/18 studies, 72.2%), a prospective cohort  
167 design (4/18 studies, 22.2%), or described the development of a pilot RDT assay (1/18  
168 studies, 5.5%)[10]. Description of the tested population and the setting where they were  
169 applied was almost absent in the studies.

### 170 **Global availability of Chikungunya RDTs**

171 Table 2 shows the characteristics of CHIKV RDTs developed or commercialized for POC  
172 applications. The countries that manufacturer the most CHIKV RDTs were Brazil ( $n=17$ ),  
173 followed by the USA ( $n=7$ ), South Korea ( $n=7$ ), and India ( $n=6$ ) [Figure 1].

174 Overall, the CHIKV RDT market is fragmented, but the manufacturer with the most products  
175 in the market is Chembio Diagnostics Brazil ( $n= 5$  products) and SD BIOSENSOR ( $n=3$   
176 products) [Table 3]. Almost all assays are antibody-based RDTs ( $n=43$ ) designed in an  
177 immunochromatographic format. There were neither antigen-based RDTs nor a  
178 combination of antibody and antigen-based RDTs commercially available. Our searches for  
179 approved assays in national regulatory authorities did not find any assay registered by the  
180 European Medicines Agency or the U.S. Food and Drug Administration. Conversely, the  
181 Brazilian National Health Surveillance Agency (ANVISA) has approved 23 CHIKV RDTs for  
182 clinical use. Of these, 5/23 (21.7%) were multiplex assays with targets concomitant for  
183 Dengue and Zika analytes. Supplementary Table 1 shows the characteristics of CHIKV RDTs  
184 approved by the ANVISA.

### 185 **Diagnostic accuracy results**

186 Table 4 shows a summary of the diagnostic assessments included conducted between 2005-  
187 2019. In total, 3722 samples were tested with RDTs across all the studies (Supplementary  
188 Figure 3). Sample types included whole blood, plasma, and serum. Twelve studies examined  
189 the performance of antibody-based RDTs [11][12][13][14][15][16][17][9,18][19][9] while  
190 five the antigen-based RDTs [20][21][22][5][23].

191 The predominant CHIKV RDT assay evaluated in the studies was the OnSite® Chikungunya  
192 IgM Combo Rapid test (CTK Biotech, Inc., Poway, CA, USA) in 8/17 (47%) studies, followed by  
193 the SD BIOLINE Chikungunya IgM test (Standard Diagnostics Inc., Yongin-si, South Korea) in  
194 3/17 (17.6%) studies. The most of antibody RDTs studies target IgM, while four studies

195 target both IgM and IgG immunoglobulin components. Figure 2 shows the diagnostic  
196 accuracy for the OnSite® Chikungunya IgM Combo Rapid test and SD BIOLINE Chikungunya  
197 IgM test.

198 Overall, the sensitivity of the RDT IgM component typically ranged between 20% and 100%.  
199 The sensitivity of the RDT IgG component ranged from 5-100%. The RDT IgM and the IgG  
200 specificity ranged from 77.6-100% and 85.4-100%, respectively. Interestingly, some studies  
201 reported an increase in the overall sensitivity of antibody-based RDT over time [[4][15].

202 There are two types of antigen-based RDTs evaluated – E1 and E1/E2-antigens tests. The  
203 sensitivity of the E1-antigen tests ranged from 33.3 to 100%. Conversely, the specificity  
204 varied between 83.1-100%.

#### 205 **Risk of bias assessment**

206 Figure 3 summarizes the QUADAS-2 assessment by study. There were patient selection  
207 applicability concerns for most of the study ( $n=14$ ) because there was a lack of sufficient  
208 information reported in the studies regarding the patient population, demographic features,  
209 setting of the study, or presence of co-morbidities. Similarly, there was a high risk of bias in  
210 the patient selection domain because only three studies enrolled a consecutive or random  
211 sample of eligible patients with suspicion of CHIKV infection to reduce the bias in the  
212 diagnostic accuracy of the index test.

#### 213 **Discussion**

##### 214 **Summary of evidence**

215 This scoping review identified 18 studies conducted between 2005 and 2019, addressing the  
216 research stage on CHIKV RDTs across various settings. Our findings indicate a paucity of  
217 research focusing on field trials and implementation studies related to CHIKV RDTs. Our  
218 work provides a global view of publicly available data on CHIKV RDTs currently under

219 development or commercially available. We also found that the in vitro diagnostic medical  
220 device manufacturers are primarily concentrated on CHIKV antibody RDTs, and their  
221 accuracy overall performs poorly and should not be used in clinical settings as long as they  
222 suffer significant improvements [15][4]. Conversely, antigen RDTs, although still in a  
223 development phase, promise to have a high level of sensitivity and specificity across the  
224 distinct CHIKV genotypes [5][22].

225 Given the problems associated with the existing diagnostic strategies for CHIKV, there is a  
226 clear and urgent need for new, appropriate diagnostic tools for CHIKV that meet the ideal  
227 product profile of “REASSURED” diagnostics [24]. The characteristics of the diagnostics  
228 products mentioned above are defined by a set of criteria which includes: (i) Real-time  
229 connectivity; (ii) Ease of specimen collection; (iii) Environmental friendliness; (iv) Affordable  
230 by those at risk of infection; (v) Sensitive (few false-negatives); (vi) Specific (few false-  
231 positives); (vii) User-friendly (simple to perform and requiring minimal training); (viii) Rapid  
232 (to enable treatment at first visit) and Robust (does not require refrigerated storage); (xi)  
233 Equipment-free; and (x) Delivered to those who need it. Few products right now meet the  
234 ideal “REASSURED” profile, and new research and investments are required to develop  
235 those that match the profile needed. Pertinent questions about feasibility, acceptability,  
236 cost-effectiveness, sustainability, and policy implications must be addressed before the  
237 widespread use of CHIKV RDTs in endemic countries. More importantly, we also need to  
238 address the impact of CHIKV RDTs into integrated fever case management and how its  
239 implementation translates into a better prescription practice for acute febrile patients (i.e.,  
240 reducing unnecessary antibiotic prescription).

241 The CHIKV RDTs diagnostic landscape is fragmented, with many gaps along the development  
242 pathway. Figure 4 shows our proposed conceptual framework that delineates the challenges

243 and opportunities across each stage of CHIKV RDT development. Concerted efforts leading  
244 by different stakeholders (i.e., international donors, industry, public sector, and end-users)  
245 should be put together to bring more equity to the availability of appropriate CHIKV RDTs to  
246 those needed most.

#### 247 **Limitations**

248 Our work has limitations. Although we made a herculean effort to identify the highest  
249 numbers of CHIKV RDTs manufactured or commercially available in the market, we  
250 understand that some could not be identified and were not publicly available. However, we  
251 addressed this bias by looking into CHIKV RDTs that national/regional regulatory agencies  
252 have approved or those that provided data from unpublished sources (i.e., conference  
253 abstracts, manufacturers' reports, author's unpublished data). Next, we did not provide an  
254 effect estimate for the results of diagnostic accuracy studies, because as shown in our risk of  
255 bias assessment, the studies included were very heterogeneous, and a meta-analytic  
256 approach would be useless.

#### 257 **Conclusions**

258 Our scoping review demonstrated substantial gaps in the current diagnostic landscape of  
259 CHIKV RDTs. The future needs of immunoassay-based RDTs for CHIKV are summarized in  
260 Box.

261 The time is suitable for a collaborative, focused initiative between policy-makers and other  
262 relevant stakeholders to address the urgent need for new, appropriate CHIKV RDTs.  
263 Unprecedented opportunities for market interventions exist and utilize new technologies to  
264 make a significant, measurable impact. Further research is desperately needed to facilitate  
265 the incorporation of CHIKV RDTs into integrated fever algorithms, and socio-behavioral  
266 research should be done to evaluate end-user acceptability.

## Box. Future needs of immunoassay-based RDTs for CHIKV infection

### Market needs

- Foster the development of antigen-based RDTs should significantly enhance assays sensitivity in the first days of illness onset

### Regulatory needs

- Work to harmonize diagnostic accuracy evaluations so that there is comparability between studies
- World Health Organization (WHO) Pre-Qualification scope as well as the WHO Essential Diagnostic List would need to be expanded to include CHIKV RDTs, as is the case for Dengue and Zika. This would ensure that potential buyers/end-users at low-resource countries, identified quality-assured CHIKV RDTs

### Technical needs

- More evidence is needed to clarify the performance of CHIKV RDT assays in samples collected from distinct regions of the globe where different CHIKV lineages circulate. The first-generation of antigen-based RDTs had performance greatly influenced by the genotype

### Operational needs

- Examine the operational characteristics of different RDTs when tested at high temperatures (> 30°C), commonly found in CHIKV-endemic regions. Other aspects should also be evaluated: the impact of samples other than serum, the influence of extensive reading times (> 20 min), and the effect of prozone phenomena

267

268

### 269 **Contributions**

270 All authors critically reviewed the manuscript, gave their final approvals, and are accountable  
271 for accuracy and integrity.

### 272 **Acknowledgments**

273 J.M. received a scholarship from Fundacao de Amparo a Pesquisa do Estado do Rio de  
274 Janeiro (FAPERJ) for his Ph.D. study in Brazil.

275

276 **Funding**

277 This work has not received any funding

278 **Conflicts of interest**

279 None to declare

280 **References**

- 281 1. Weaver SC, Lecuit M. Chikungunya virus and the global spread of a mosquito-borne  
282 disease. *N Engl J Med. United States*; 2015;372:1231–9.
- 283 2. Leta S, Beyene TJ, De Clercq EM, Amenu K, Kraemer MUG, Revie CW. Global risk mapping  
284 for major diseases transmitted by *Aedes aegypti* and *Aedes albopictus*. *Int J Infect Dis IJID*  
285 *Off Publ Int Soc Infect Dis.* 2018;67:25–35.
- 286 3. Kerkhof K, Falconi-Agapito F, Van Esbroeck M, Talledo M, Ariën KK. Reliable Serological  
287 Diagnostic Tests for Arboviruses: Feasible or Utopia? *Trends Microbiol [Internet]*. K.K. Ariën,  
288 Department of Biomedical Sciences, Unit of Virology, Institute of Tropical Medicine,  
289 Antwerp, Belgium; 2020;28:276–92. Available from:  
290 [https://www.embase.com/search/results?subaction=viewrecord&id=L2004290661&from=e](https://www.embase.com/search/results?subaction=viewrecord&id=L2004290661&from=export)  
291 [xport](#)
- 292 4. Rianthavorn P, Wuttirattanakowit N, Prianantathavorn K, Limpaphayom N,  
293 Theamboonlers A, Poovorawan Y. Evaluation of a rapid assay for detection of IgM  
294 antibodies to chikungunya. *Southeast Asian J Trop Med Public Health. Thailand*;  
295 2010;41:92–6.
- 296 5. Suzuki K, Huits R, Phadungsombat J, Tuekprakhon A, Nakayama EEEE, Van Den Berg R, et  
297 al. Promising application of monoclonal antibody against chikungunya virus E1-antigen  
298 across genotypes in immunochromatographic rapid diagnostic tests. *Viol J.* 2020;17:90.
- 299 6. Huits R, Okabayashi T, Cnops L, Barbé B, Van Den Berg R, Bartholomeeusen K, et al.

- 300 Diagnostic accuracy of a rapid E1-antigen test for chikungunya virus infection in a reference  
301 setting. *Clin Microbiol Infect Off Publ Eur Soc Clin Microbiol Infect Dis. England*;  
302 2018;24:78–81.
- 303 7. Tricco AC, Lillie E, Zarin W, O'Brien KK, Colquhoun H, Levac D, et al. PRISMA Extension for  
304 Scoping Reviews (PRISMA-ScR): Checklist and Explanation. *Ann Intern Med. United States*;  
305 2018;169:467–73.
- 306 8. Whiting PF, Rutjes AWS, Westwood ME, Mallett S, Deeks JJ, Reitsma JB, et al. QUADAS-2:  
307 a revised tool for the quality assessment of diagnostic accuracy studies. *Ann Intern Med.*  
308 *United States*; 2011;155:529–36.
- 309 9. Mistretta M, Bonafini S, Angheben A, Gobbo M, Tais S, Bisoffi Z. Assessment of a Rapid  
310 Diagnostic Test for Chikungunya. *Trop Med Int Heal [Internet]*. M. Mistretta, Ospedale  
311 Sacrocuore, Centre for Tropical Diseases, Negrar (Verona), Italy; 2009;14:227. Available  
312 from:  
313 [https://www.embase.com/search/results?subaction=viewrecord&id=L70253091&from=exp](https://www.embase.com/search/results?subaction=viewrecord&id=L70253091&from=export)  
314 [ort](https://www.embase.com/search/results?subaction=viewrecord&id=L70253091&from=export)
- 315 10. Lee S, Mehta S, Erickson D. Two-Color Lateral Flow Assay for Multiplex Detection of  
316 Causative Agents behind Acute Febrile Illnesses. *Anal Chem.* 2016;88:8359–63.
- 317 11. Lee H, Ryu JH, Yun S, Jang JH, Choi AR, Cho SY, et al. Evaluation of a Newly Developed  
318 Rapid Automated Fluorescent Lateral Flow Immunoassay to Detect IgG and IgM Antibodies  
319 to Chikungunya Virus. *Infect Chemother.* 2020;52:611–5.
- 320 12. WON-Shik Kim, Yong-Gyoo Lee, Man Kyu Huh YL. CHIKUNGUNYA VIRUS INFECTION  
321 EVALUATION USING RAPID DIAGNOSTIC TESTS (RDTS) BASED ON ANTI-CHIKUNGUNYA  
322 IGM/IGG. *Eur J Pharm Med Res.* 2019;6:30–5.
- 323 13. Burdino E, Calleri G, Caramello P, Ghisetti V. Unmet Needs for a Rapid Diagnosis of

- 324 Chikungunya Virus Infection. *Emerg. Infect. Dis.* 2016. p. 1837–9.
- 325 14. Prat CM, Flusin O, Panella A, Tenebray B, Lanciotti R, Leparç-Goffart I. Evaluation of  
326 commercially available serologic diagnostic tests for chikungunya virus. *Emerg Infect Dis.*  
327 2014;20:2129–32.
- 328 15. Kosasih H, Widjaja S, Surya E, Hadiwijaya SH, Butarbutar DPR, Jaya U.A., et al. Evaluation  
329 of two IgM rapid immunochromatographic tests during circulation of Asian lineage  
330 Chikungunya virus. *Southeast Asian J Trop Med Public Health. Thailand*; 2012;43:55–61.
- 331 16. Arya SC, Agarwal N. Rapid point-of-care diagnosis of chikungunya virus infection. *Asian*  
332 *Pacific J Trop Dis* [Internet]. S.C. Arya, Sant Parmanand Hospital, 18 Alipore Road, Delhi-  
333 110054, India; 2011;1:230–1. Available from:  
334 [https://www.embase.com/search/results?subaction=viewrecord&id=L364263335&from=ex](https://www.embase.com/search/results?subaction=viewrecord&id=L364263335&from=export)  
335 [port](https://www.embase.com/search/results?subaction=viewrecord&id=L364263335&from=export)
- 336 17. Yap G, Pok K-YK-Y, Lai Y-LY-L, Hapuarachchi H-CH-C, Chow A, Leo Y-SY-S, et al. Evaluation  
337 of Chikungunya diagnostic assays: differences in sensitivity of serology assays in two  
338 independent outbreaks. *PLoS Negl Trop Dis.* 2010;4:e753.
- 339 18. Johnson BW, Goodman CH, Holloway K, De Salazar PM, Valadere AM, Drebot MA.  
340 Evaluation of commercially available Chikungunya Virus Immunoglobulin M detection  
341 assays. *Am J Trop Med Hyg.* 2016;95:182–92.
- 342 19. Wang R, Ongagna-Yhombi SY, Lu Z, Centeno-Tablante E, Colt S, Cao X, et al. Rapid  
343 Diagnostic Platform for Colorimetric Differential Detection of Dengue and Chikungunya  
344 Viral Infections. *Anal Chem.* 2019;91:5415–23.
- 345 20. Huits R, Okabayashi T, Cnops L, Barbé B, Van Den Berg R, Bartholomeeusen K, et al.  
346 Diagnostic accuracy of a rapid E1-antigen test for chikungunya virus infection in a reference  
347 setting. *Clin Microbiol Infect.* 2018;24:78–81.

- 348 21. Okabayashi T, Sasaki T, Masrinoul P, Chantawat N, Yoksan S, Nitatpattana N, et al.  
349 Detection of chikungunya virus antigen by a novel rapid immunochromatographic test. *J Clin*  
350 *Microbiol.* 2015;53:382–8.
- 351 22. Jain J, Okabayashi T, Kaur N, Nakayama E, Shioda T, Gaird R, et al. Evaluation of an  
352 immunochromatography rapid diagnosis kit for detection of chikungunya virus antigen in  
353 India, a dengue-endemic country. *Virology*. 2018;15.
- 354 23. Reddy A, Bosch I, Salcedo N, Herrera BB, de Puig H, Narváez CF, et al. Development and  
355 Validation of a Rapid Lateral Flow E1/E2-Antigen Test and ELISA in Patients Infected with  
356 Emerging Asian Strain of Chikungunya Virus in the Americas. *Viruses*. 2020;12.
- 357 24. Land KJ, Boeras DI, Chen X-S, Ramsay AR, Peeling RW. REASSURED diagnostics to inform  
358 disease control strategies, strengthen health systems and improve patient outcomes. *Nat*  
359 *Microbiol.* 2019;4:46–54.
- 360
- 361
- 362
- 363
- 364
- 365
- 366
- 367
- 368
- 369
- 370
- 371

372 **Figure legend**

373 Figure 1. Number of Chikungunya rapid diagnostic tests developed or commercialized for  
374 point-of-care application by country of manufacture

375 Figure 2. Summary of diagnostic accuracy studies evaluating the OnSite® Chikungunya IgM  
376 Combo Rapid test (CTK Biotech, Inc., Poway, CA, USA) and the SD BIOLINE Chikungunya IgM  
377 test (Standard Diagnostics Inc., Yongin-si, South Korea)

378 Figure 3. QUADAS-2 assessment of studies

379 Figure 4. Chikungunya rapid diagnostic tests: Fragmented landscape presents market  
380 challenges and opportunities for interventions

381

382

383

384

385

386

387

388

389

390

391

392

393

394

395

396 **Figure 1**

**Number of Chikungunya rapid diagnostic tests developed or commercialized for point-of-care application by country of manufacture**

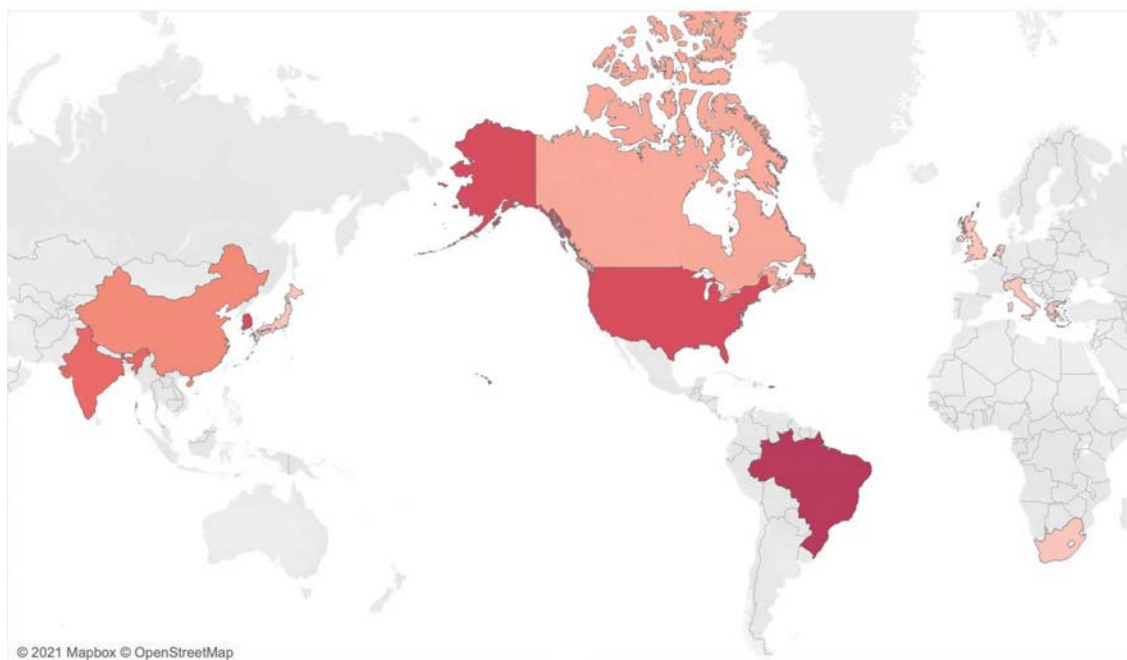

Assumptions: All data represents publicly available information. The location of the diagnostic manufacturer is currently assumed to be the manufacturing headquarters, not necessarily where the Chikungunya RDT is being manufactured.

Number of Chikungunya RDT by country

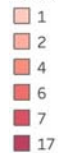

397

398

399

400

401

402

403

404

405

406

407

408

409

410

411

412

413

414

415 **Figure 2**  
416

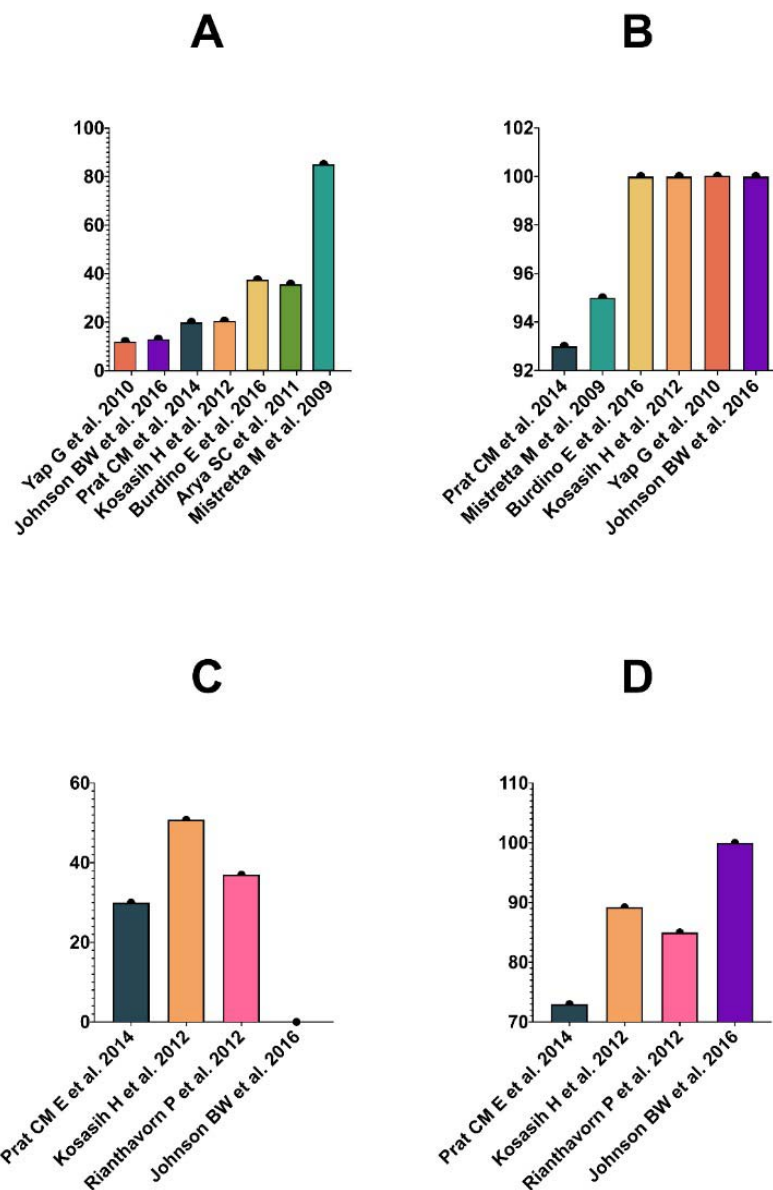

417  
418  
419  
420  
421  
422  
423  
424  
425  
426

- A. OnSite® Chikungunya IgM Combo Rapid test (CTK Biotech, Inc., Poway, CA, USA) sensitivity across the studies
- B. OnSite® Chikungunya IgM Combo Rapid test (CTK Biotech, Inc., Poway, CA, USA) specificity across the studies
- C. SD BIOLINE Chikungunya IgM test (Standard Diagnostics Inc., Yongin-si, South Korea) sensitivity across the studies
- D. SD BIOLINE Chikungunya IgM test (Standard Diagnostics Inc., Yongin-si, South Korea) specificity across the studies

427 **Figure 3**  
428

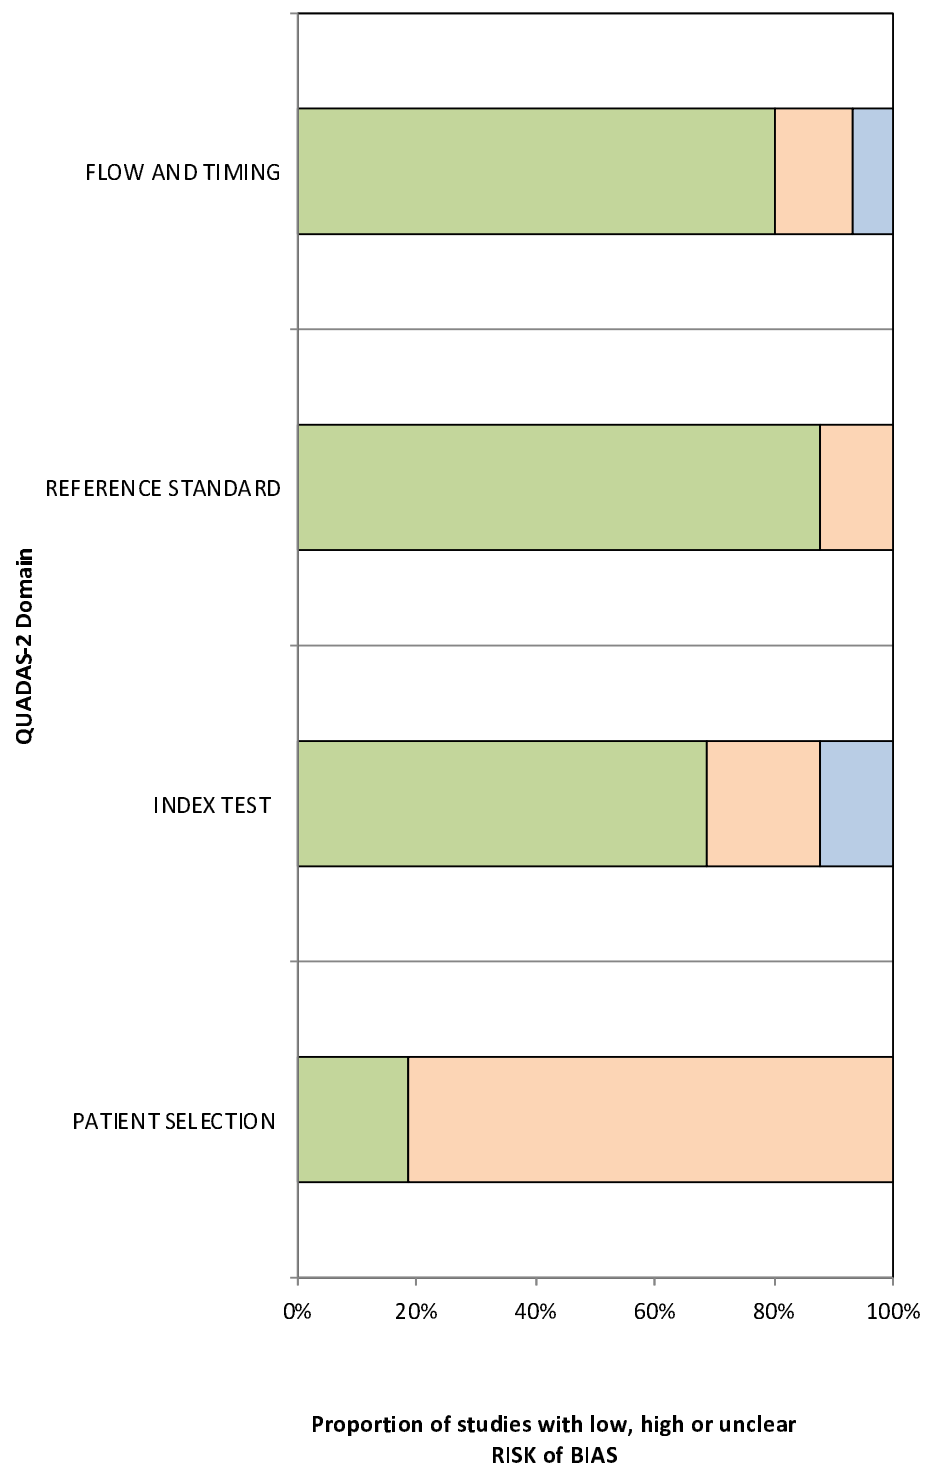

429

■ Low ■ High ■ Unclear

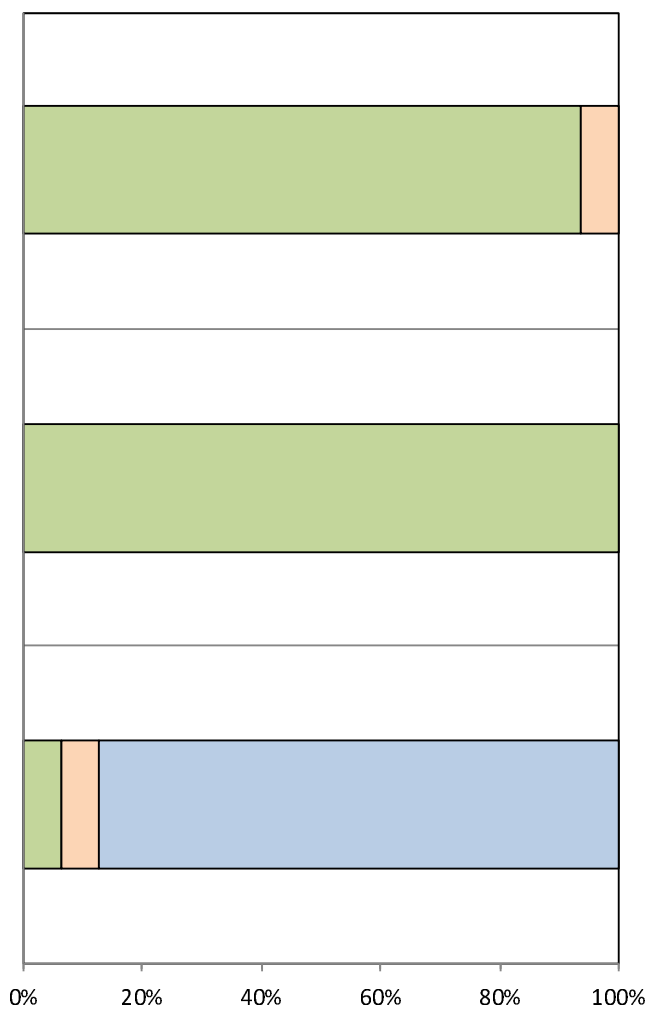

**Proportion of studies with low, high, or unclear CONCERNS regarding APPLICABILITY**

430  
431  
432  
433

434 Figure 4. Chikungunya rapid diagnostic tests: Fragmented landscape presents market  
 435 challenges and opportunities for interventions  
 436  
 437

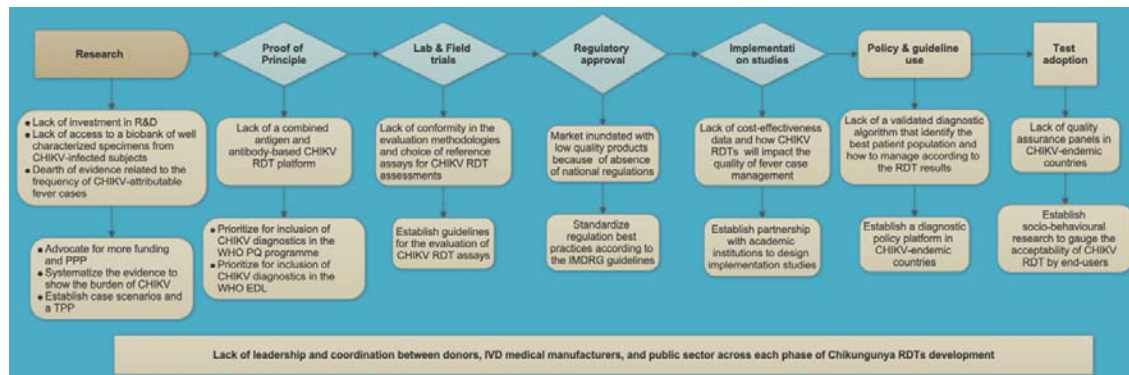

438  
 439 CHIKV chikungunya virus; RDT rapid diagnostic test; EDL World Health Organization'  
 440 Essential diagnostic list; IMDRG International Medical Devices Regulatory Forum; IVD in-  
 441 vitro diagnostic products; PPP Public-Private Partnership; P.Q. World Health Organization'  
 442 in-vitro diagnostic pre-qualification program; R&D Research & Development; TPP target  
 443 product profile; WHO World Health Organization

444  
 445  
 446  
 447  
 448  
 449  
 450  
 451  
 452  
 453  
 454  
 455  
 456  
 457  
 458  
 459  
 460  
 461  
 462  
 463  
 464  
 465  
 466  
 467  
 468  
 469  
 470  
 471

472 Table.1 Characteristics of included studies evaluating Chikungunya antibody or antigen-based rapid diagnostic tests, 2005-2019.  
 473  
 474

| First author, year [Reference]           | Location                                                     | Study design            | Assay                                | Assay's phase of diagnostic development | Setting      | Age (years)     | Severity   |
|------------------------------------------|--------------------------------------------------------------|-------------------------|--------------------------------------|-----------------------------------------|--------------|-----------------|------------|
| <b>Moreira J et al. 2021 unpublished</b> | Brazil                                                       | Prospective recruitment | DPP® ZCD IgM/IgG                     | Phase III                               | Primary care | 26 [IQR: 15-41] | Non-severe |
| <b>Reddy A et al. 2020 [23]</b>          | Honduras & Colombia                                          | Case-control            | E1/E2-Antigen test                   | Phase I                                 | ND           | ND              | ND         |
| <b>Suzuki et al. 2020 [5]</b>            | Aruba & Bangladesh                                           | Case-control            | E1-Antigen test                      | Phase I                                 | ND           | ND              | ND         |
| <b>Lee H et al. 2020 [11]</b>            | ND                                                           | Case-control            | ichroma® Chikungunya virus (IgG/IgM) | Phase II                                | ND           | ND              | ND         |
| <b>Kim WS et al. 2019 [12]</b>           | ND                                                           | Case-control            | Chikungunya IgM/IgG (GenBody)        | Phase II                                | ND           | ND              | ND         |
| <b>Wang R et al. 2019 [19]</b>           | Colombia                                                     | Case-control            | DENV IgG/IgM<br>CHIKV IgG/IgM        | Phase I                                 | ND           | 18-74           | ND         |
| <b>Huits R et al. 2018 [20]</b>          | Mauritius, Réunion, India, Thailand, French Polynesia, Aruba | Case-control            | E1-Ag test                           | Phase I                                 | ND           | ND              | ND         |
| <b>Jain J et al. 2018 [22]</b>           | India                                                        | Case-control            | E1-Ag test                           | Phase I                                 | ND           | ND              | ND         |
| <b>Lee S et al. 2016</b>                 | ND                                                           | Development             | DENV IgG/IgM                         | Phase I                                 | ND           | ND              | ND         |

|                                                            |                                              |                                     |                                                                                      |          |    |    |    |
|------------------------------------------------------------|----------------------------------------------|-------------------------------------|--------------------------------------------------------------------------------------|----------|----|----|----|
| <b>[10]</b><br><b>Burdino E et al.</b><br><b>2016 [13]</b> | Caribbean &<br>Latin America                 | study<br>Prospective<br>recruitment | CHIKV IgG/IgM<br>OnSite®<br>Chikungunya<br>IgM Combo<br>Rapid test                   | -        | ND | ND | ND |
| <b>Johnson BW et al.</b><br><b>2016 [18]</b>               | ND                                           | Case-control                        | OnSite® CHIKV<br>IgM Combo<br>Rapid test<br>SD BIOLINE<br>Chikungunya<br>IgM         | Phase II | ND | ND | ND |
| <b>Okabayashi T et al.</b><br><b>2015 [21]</b>             | Thailand, Laos,<br>Indonesia, and<br>Senegal | Case-control                        | E1-Ag test                                                                           | Phase I  | ND | ND | ND |
| <b>Prat CM et al.</b><br><b>2014 [14]</b>                  | ND                                           | Case-control                        | SD BIOLINE<br>Chikungunya<br>IgM<br>OnSite®<br>Chikungunya<br>IgM Combo<br>Rapid tes | Phase II | ND | ND | ND |
| <b>Kosasih H et al.</b><br><b>2012 [15]</b>                | Indonesia                                    | Case-control                        | OnSite®<br>Chikungunya<br>IgM Rapid test<br>SD BIOLINE<br>Chikungunya<br>IgM test    | Phase II | ND | ND | ND |
| <b>Arya SC et al.</b><br><b>2011 [16]</b>                  | India                                        | Case-control                        | OnSite®<br>Chikungunya<br>IgM Rapid test                                             | Phase II | ND | ND | ND |

|                                      |           |                         |                                                   |           |    |    |        |
|--------------------------------------|-----------|-------------------------|---------------------------------------------------|-----------|----|----|--------|
| <b>Yap G et al. 2010 [17]</b>        | Singapore | Case-control            | OnSite®<br>Chikungunya<br>IgM Combo<br>Rapid test | Phase II  | ND | ND | Severe |
| <b>Rianthavorn P et al. 2010 [4]</b> | Thailand  | Prospective recruitment | OnSite®<br>Chikungunya<br>IgM Combo<br>Rapid test | Phase III | ND | ND | ND     |
| <b>Mistretta M et al. 2009 [9]</b>   | Italy     | Prospective recruitment | OnSite®<br>Chikungunya<br>IgM Combo<br>Rapid test | Phase III | ND | ND | ND     |

475 ICT immunochromatographic assay; IQR interquartile range; ND not described

476 Phases of diagnostics developments are classified in 4 phases: phase I which consist of prototype evaluation process; phase II evaluation under  
 477 ideal conditions using convenience or archived samples; phase III evaluations under ideal conditions assessing the performance and operation  
 478 characteristics of product in target populations; and phase IV which are assessments of impact of diagnostics on prevalence of infection,  
 479 incidence of infection, or incidence of complications

480

481

482

483

484

485

486

487

488

489 Table 2. Characteristics of Chikungunya rapid diagnostic tests developed or commercialized for point-of-care application

490

| Manufacturer | Manufacturer | Product | Analytes | Quoted | Storage | Sample | Format | Sample | Reading |
|--------------|--------------|---------|----------|--------|---------|--------|--------|--------|---------|
|--------------|--------------|---------|----------|--------|---------|--------|--------|--------|---------|

|                                                | country     | name                                                      |                                                 | accuracy<br>(Sn/Sp)            | temperature<br>(°C) |         |     | volume<br>(uL) | time<br>(min) |
|------------------------------------------------|-------------|-----------------------------------------------------------|-------------------------------------------------|--------------------------------|---------------------|---------|-----|----------------|---------------|
| <b>ARKRAY, Inc.</b>                            | Japan       | E1-Ag test                                                | E1                                              | NA                             | NA                  | S       | DS  | 30             | 15            |
| <b>Boditech Med Inc.</b>                       | South Korea | iChroma                                                   | IgG/IgM                                         | NA                             | NA                  | S, P, W | IC  | 30             | 12            |
| <b>Meridian Bioscience, Inc.</b>               | USA         | TruQuick™ CHIKV<br>IgG/IgM 40 T                           | IgG/IgM                                         | IgG: 94.3/97<br>IgM: 90.3/99.9 | 2-30                | S, P, W | IC  | 40             | 15            |
| <b>Biotest</b>                                 | China       | MedTest<br>Chikungunya ML-02                              | IgM/IgG                                         | 99.9/99.9                      | 2-30                | S, P, W | IC  | 40             | 15            |
| <b>Oscar Medicare Pvt Ltd</b>                  | India       | Oscar<br>Chikungunya test                                 | IgM/IgG                                         | NA                             | 2-30                | S, P    | IC  | NA             | NA            |
| <b>Bio Footprints<br/>Healthcare Pvt. Ltd.</b> | India       | Mytest One Step<br>Chikungunya IgM<br>Test kit            | IgM                                             | NA                             | NA                  | S, P    | IC  | NA             | NA            |
| <b>LumiQuick Diagnostics</b>                   | USA         | Chikungunya test<br>kit QuickProfile                      | IgG/IgM                                         | NA                             | 4-30                | S, P, W | IC  | NA             | NA            |
| <b>INTERMEDICAL</b>                            | Italy       | Chikungunya IgM<br>Rapid Test                             | IgM                                             | 96.9/98.6                      | 2-30                | S, P, W | IC  | 50             | 15            |
| <b>Neo nostics</b>                             | China       | Chikungunya<br>IgG/IgM Rapid<br>test                      | IgG/IgM                                         | NA                             | 2-30                | S, P, W | IC  | NA             | NA            |
| <b>Anand Enterprises</b>                       | India       | Chikungunya IgM<br>One Step                               | IgM                                             | NA                             | NA                  | S, P    | IC  | NA             | NA            |
| <b>BIOZEK medical</b>                          | Netherlands | Chikungunya<br>IgG/IgM Rapid<br>Test Cassette             | IgG/IgM                                         | NA                             | NA                  | S, P, W | IC  | NA             | NA            |
| <b>Atlas Link Technology<br/>Co., Ltd</b>      | China       | NOVAtest<br>Chikungunya<br>IgG/IgM Rapid<br>Test Cassette | IgG/IgM                                         | NA                             | NA                  | S, P, W | IC  | NA             | 15            |
| <b>SD BIONSENSOR</b>                           | South Korea | STANDARD Q<br>Chikungunya<br>IgM/IgG                      | IgM/IgG                                         | IgM: 100/97.6<br>IgG: 100/99.6 | 2-40                | S, P, W | IC  | 10             | 15-20         |
| <b>SD BIONSENSOR</b>                           | South Korea | STANDARD F<br>Chikungunya<br>IgM/IgG FIA                  | IgM/IgG                                         | NA                             | 2-30                | S, P, W | FIA |                | 15            |
| <b>SD BIONSENSOR</b>                           | South Korea | STANDARD Q<br>Arbo Panel I<br>(Z/D/C/Y)                   | IgM (ZIKV,<br>DENV, CHIKV,<br>YFV), DENV<br>NS1 | NA                             | 2-40                | S, P, W | IC  | 10-100         | 15-20         |

|                                                       |              |                                                                              |               |                                |      |         |    |        |       |
|-------------------------------------------------------|--------------|------------------------------------------------------------------------------|---------------|--------------------------------|------|---------|----|--------|-------|
| <b>Tulip Diagnostics Ltd.</b>                         | India        | INSIGHT Chikv                                                                | IgM           |                                | 4-30 | S, W    |    | 5-10   | 15    |
| <b>Biopanda Reagents</b>                              | UK           | Chikungunya IgG/IgM Rapid Test                                               | IgG/IgM       | IgG: 94.3/97<br>IgM: 90.3/99.9 | 2-30 | S, P, W | IC |        | 15    |
| <b>GenBody Inc.</b>                                   | South Korea  | Chikungunya IgM/IgG                                                          | IgM/IgG       | IgM: 97.1/98.5<br>IgG: 98/98   | 2-30 | S, P, W | IC | 30-60  | 15-20 |
| <b>BHAT Bio-Scan</b>                                  | India        | Chikungunya IgM Spot Test                                                    | IgM           | NA                             | 2-8  | S, P    | IC | NA     | 15    |
| <b>Acro Biotech, Inc</b>                              | USA          | Immunoassay Ivd Chikungunya Rapid Diagnostic Test kit                        | IgG, IgM      | NA                             | NA   | S, P, W | IC | NA     | NA    |
| <b>J. Mitra &amp; Co. Pvt. Ltd.</b>                   | India        | Advantage Chikungunya IgM Card                                               | IgM           | 97.5/99.1                      | 2-30 | S, P, W | IC | 70     | 15    |
| <b>JP BioGen Diagnostics Ltd</b>                      | Greece       | Chikungunya IgM TES                                                          | IgM           | 97.1/91.1                      | NA   | S, P, W | IC | 50-100 | 10    |
| <b>ICT diagnostics</b>                                | South Africa | Chikungunya IgG/IgM Rapid Test Cassette                                      | IgG/IgM       | IgG: 94.3/97<br>IgM: 90.3/99.9 | 2-40 | S, P, W | IC | 40     | 15    |
| <b>Diagnostic Automation/Cortez Diagnostics, Inc.</b> | USA          | OneStep Chikungunya IgG/IgM Combo RapiCard™ InstaTest                        | IgG, IgM      | NA                             | 4-30 | S, P, W | IC | 5      | 15    |
| <b>HWTai BioTec</b>                                   | China        | Rapid chikungunya test                                                       | IgM           | NA                             | NA   | S, P, W | IC | NA     | NA    |
| <b>Teco Diagnostics</b>                               | USA          | Chikungunya IgM                                                              | IgM           | NA                             | NA   | S, P, W | IC | NA     | NA    |
| <b>Biocan diagnostics, Inc.</b>                       | Canada       | Chikungunya IgG/IgM Ab Rapid Test                                            | IgG/IgM       | NA                             | NA   | S, P, W | IC | NA     | NA    |
| <b>Biocan Diagnostics, Inc.</b>                       | Canada       | Zika IgG/IgM Ab, Dengue IgG/IgM & NS1 Ag & Chikungunya IgG/IgM Ab Combo Test | IgM, IgG, NS1 | NA                             | NA   | S, P, W | IC | NA     | NA    |
| <b>Bioditech Med</b>                                  | South Korea  | ichroma CHIKV IgG/IgM                                                        | IgG, IgM      | NA                             | NA   | S, P, W | IC | 30     | 12    |
| <b>Standard Diagnostics Inc.</b>                      | South Korea  | SD Bioline Chikungunya IgM                                                   | IgM           | 97.1/98.9                      | 1-30 | S, P, W | IC | 50-100 | 10    |

|                                  |        |                                                |                           |                                                       |      |         |    |       |       |
|----------------------------------|--------|------------------------------------------------|---------------------------|-------------------------------------------------------|------|---------|----|-------|-------|
| <b>CTK Biotech Inc.</b>          | USA    | OnSite™<br>Chikungunya IgM<br>Combo Rapid Test | IgM                       | 90.4/98                                               | 2-30 | S, P, W | IC | 5     | 15    |
| <b>Chembio Diagnostics, Inc.</b> | USA    | DPP®<br>Chikungunya<br>IgM/IgG assay           | IgM/IgG                   | NA                                                    | 2-30 | S, P, W | IC | 10    | 15    |
| <b>Bio-Manguinhos</b>            | Brazil | DPP® ZCD IgM/IgG                               | IgM,IgG                   | IgM: 100/99.4<br>IgG: 100/100                         | 2-30 | S, P, W | IC | 10    | 15    |
| <b>Orange Life</b>               | Brazil | OL Combo<br>Chikungunya /NS1                   | DENV<br>NS1/CHIKV<br>IgM  | NS1:92.8/98.4<br>IgM: 98.5/99.5                       | NA   | S, P, W | IC | NA    | 15-20 |
| <b>Orange Life</b>               | Brazil | OL Combo<br>Chikungunya<br>Dengue -IgG/IgG     | DENV IgM/IgG<br>CHIKV IgM | DENV IgM/IgG:<br>99.5/98.5<br>CHIKV IgM:<br>98.5/99.5 | NA   | S, P, W | IC | NA    | 15-20 |
| <b>Orange Life</b>               | Brazil | OL Chikungunya<br>IgM                          | IgM                       | 98.5/99.5                                             | NA   | S, P, W | IC | NA    | 15-20 |
| <b>Orange Life</b>               | Brazil | OL Chikungunya<br>IgG/IgM                      | IgM/IgG                   | IgM/IgG:<br>98.5/98.5                                 | NA   | S, P, W | IC | NA    | 15-20 |
| <b>Eco Diagnostica</b>           | Brazil | Chikungunya<br>IgG/IgM ECO Test                | IgG/IgM                   | IgG: 100/99.6<br>IgM: 100/97.6                        | 2-30 | S, P, W | IC | 10    | 15    |
| <b>Eco Diagnostica</b>           | Brazil | Chikungunya IgM<br>ECO Test                    | IgM                       | 90.3/100                                              | 2-30 | S, P, W | IC | 30-45 | 15    |
| <b>Bahiafarma</b>                | Brazil | Chikungunya IgM<br>RDT                         | IgM                       | 94/95                                                 | 2-30 | S, P, W | IC | 30-60 | 10    |
| <b>Ebram Ltda.</b>               | Brazil | Chikungunya<br>IgG/IgM                         | IgG/IgM                   | IgG: 94.3/97<br>IgM: 90/99.9                          | 2-30 | S, P, W | IC | 40    | 15-20 |
| <b>WAMA Diagnostica</b>          | Brazil | Immuno-Rapido<br>Chikungunya<br>IgG/IgM        | IgG/IgM                   | IgG: 100/99.3<br>IgM:100/97.9                         | 2-30 | S, P, W | IC | 10    | 15-20 |
| <b>Biocon diagnosticos</b>       | Brazil | Chikungunya Test<br>(IgG/IgM)                  | IgG/IgM                   | IgG: 94.3/97<br>IgM: 90.3/99                          | NA   | S, P    | IC | NA    | 15    |
| <b>Biocon diagnosticos</b>       | Brazil | Chikungunya IgM<br>Test                        | IgM                       | 96.6/98                                               | NA   | W       | IC | NA    | 15    |

491 S serum; P plasma, W whole blood; IC Immunochromatographic assay; FIA fluorescent immunoassay; DS dipstick NA not available

492 Sn/sp: sensitivity/specificity

493 Table 3. Global Chikungunya rapid diagnostic tests landscape – key players on industry

494

## Global Chikungunya rapid diagnostic tests landscape - key players on industry

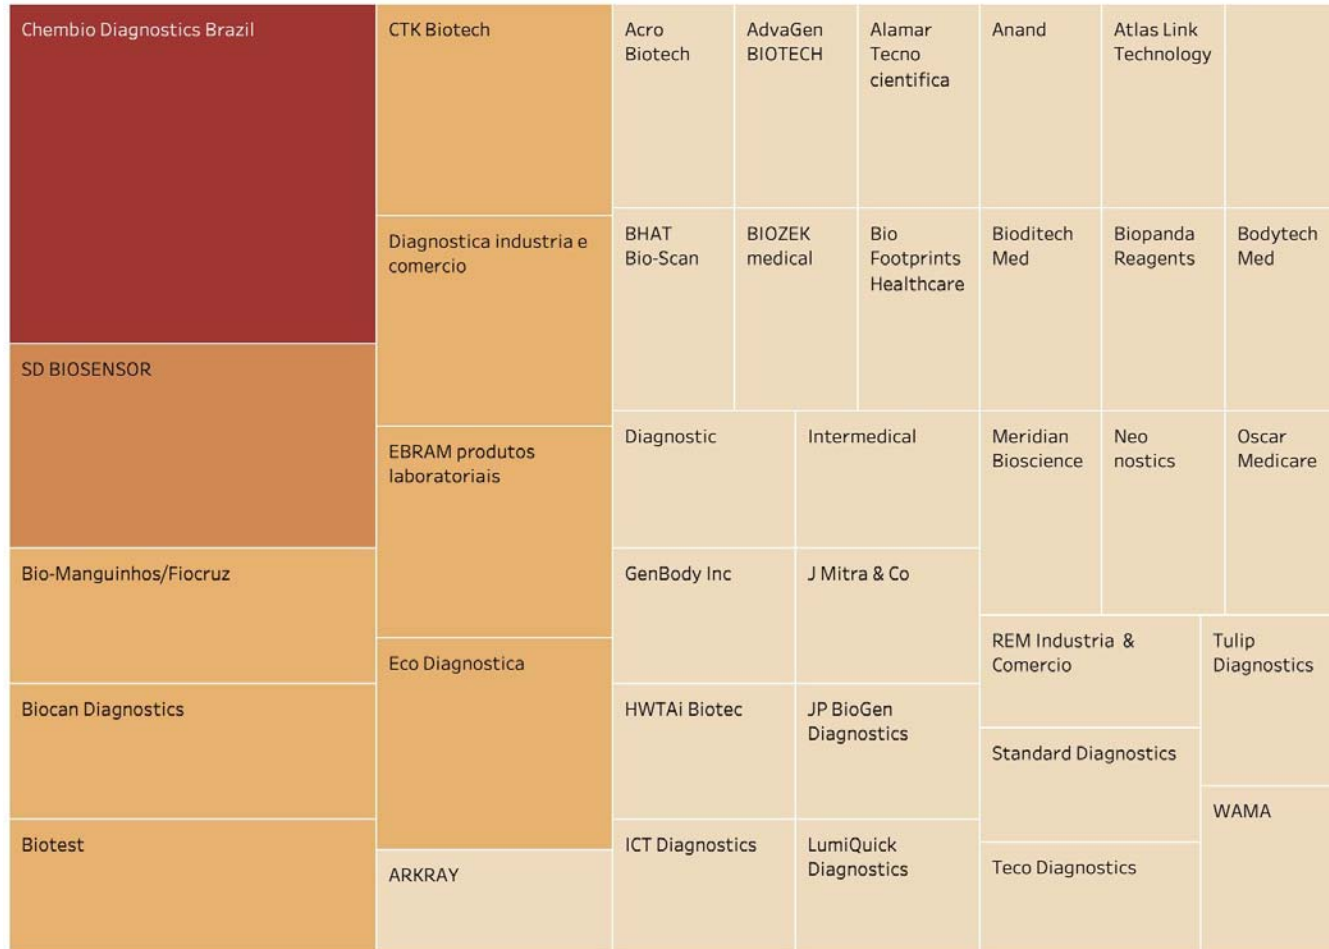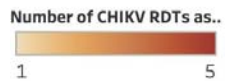

495

496  
497

Table 4. Summary of diagnostic assessments of Chikungunya antibody or antigen-based rapid diagnostic tests, 2005-2019.

| Assay                                       | Study                 | Year      | Sample size | Time from symptom onset to testing (days) | Reference comparator    | Analyte target | Sensitivity (95% CI)             | Specificity (95% CI)               |
|---------------------------------------------|-----------------------|-----------|-------------|-------------------------------------------|-------------------------|----------------|----------------------------------|------------------------------------|
| <b>Antibody-based rapid diagnostic test</b> |                       |           |             |                                           |                         |                |                                  |                                    |
| <b>DPP® ZCD IgM/IgG</b>                     |                       |           |             |                                           |                         |                |                                  |                                    |
|                                             | Moreira J et al. 2021 | 2018-2019 | 500         | 3 (IQR: 2-4)                              | Euroimmun IgM/IgG ELISA | igM            | 23.2 (15.3-32.7)                 | 77.6 (71-83.4)                     |
|                                             |                       |           |             |                                           | RT-PCR                  | igG<br>igM/IgG | 5 (1.6-11.2)<br>24 (16-33.5)     | 85.4 (79.6-90)<br>75.1 (68.4-81)   |
| <b>ichroma® Chikungunya virus (IgG/IgM)</b> |                       |           |             |                                           |                         |                |                                  |                                    |
|                                             | Lee H et al. 2020     | ND        | 256         | ND                                        | Inbios IgM/IgG ELISA    | igM<br>igG     | 100 (94.7-100)<br>100 (92.4-100) | 99.4 (97.5-99.4)<br>100 (98.3-100) |
| <b>Chikungunya IgM/IgG (GenBody)</b>        |                       |           |             |                                           |                         |                |                                  |                                    |
|                                             | Kim WS et al. 2019    | 2014      | 770         | ND                                        | ELISA                   | igM            | 83                               | 97                                 |
|                                             |                       |           |             |                                           | RT-PCR                  | igG            | 100                              | 100                                |
| <b>Multiplex RDT (under development)</b>    |                       |           |             |                                           |                         |                |                                  |                                    |
|                                             | Wang R et al. 2019    | ND        | 50          | ND                                        | Euroimmun ELISA         | igM<br>igG     | 83<br>100                        | 97<br>100                          |
| <b>OnSite® Chikungunya IgM Rapid Test</b>   |                       |           |             |                                           |                         |                |                                  |                                    |
|                                             | Burdino E et al. 2016 | 2014-2015 | 8           | 7-30                                      | Euroimmun IgM/IgG IFA   | igM            | 37.5                             | 100                                |
|                                             |                       |           |             |                                           | RT-PCR                  |                |                                  |                                    |

|                                             |           |     |                |                                                        |            |                    |                 |
|---------------------------------------------|-----------|-----|----------------|--------------------------------------------------------|------------|--------------------|-----------------|
| Prat CM et al. 2014                         | 2005-2014 | 23  | ND             | In-house IgM/IgG ELISA<br>In-house neutralization test | IgM        | 20                 | 93              |
| Kosasih H et al. 2012                       | ND        | 132 | 1 to $\geq$ 21 | In-house IgM ELISA<br>RT-PCR                           | IgM        | 20.5               | 100             |
| Arya SC et al. 2011                         | 2010      | 100 |                | IgM ELISA                                              | IgM        | 35.7               | NA              |
| Yap G et al. 2010                           | 2008      | 225 | 3.75 to $>$ 7  | IgM IFA<br>In-house IgM ELISA<br>RT-PCR                | IgM        | 12.1               | 100             |
| Mistretta M et al. 2009                     | 2006-2008 | 116 | ND             | Euroimmun IFA                                          | IgM        | 85                 | 95              |
| Johnson BW et al. 2016                      | ND        | 27  | 2-33           | CDC in-house MAC-ELISA                                 | IgM        | 13.04 (2.78-33.59) | 100 (39.76-100) |
| <b>SD Bioline Chikungunya IgM test</b>      |           |     |                |                                                        |            |                    |                 |
| Prat CM et al. 2014                         | 2005-2014 | 23  | ND             | In-house IgM/IgG ELISA<br>In-house neutralization test | IgM        | 30                 | 73              |
| Kosasih H et al. 2012                       | ND        | 132 | 1 to $\geq$ 21 | In-house IgM ELISA<br>RT-PCR                           | IgM        | 50.8               | 89.2            |
| Rianthavorn P et al. 2010                   | 2008      | 527 | 1 to $\geq$ 14 | SD Bioline IgM ELISA<br>RT-PCR                         | IgM        | 37                 | 85              |
| Johnson BW et al. 2016                      | ND        | 31  | 2-33           | CDC in-house MAC ELISA                                 | IgM        | 0                  | 100 (59-100)    |
| <b>Antigen-based rapid diagnostic tests</b> |           |     |                |                                                        |            |                    |                 |
| <b>E1-Antigen test</b>                      |           |     |                |                                                        |            |                    |                 |
| Huits R et al.                              | 2006-     | 98  | $\leq$ 10      | ECSA & Asian                                           | E1-antigen | 88.9 (56.5-98)     | 83.1 (71.5-     |

|                                         |                          |           |     |      |                                                                                |               |                                                                                                                               |                                                                                                                              |
|-----------------------------------------|--------------------------|-----------|-----|------|--------------------------------------------------------------------------------|---------------|-------------------------------------------------------------------------------------------------------------------------------|------------------------------------------------------------------------------------------------------------------------------|
|                                         | 2018                     | 2014-2015 |     |      | genotype CHIKV-specific RT-PCR Euroimmun IgM/IgG IFA                           |               | for the ECSA genotype 33.3 (19.2-51.2) for the Asian genotype                                                                 | 90.5)                                                                                                                        |
|                                         | Okabayashi T et al. 2015 | 2008-2013 | 112 | 1-14 | ECSA, Asian and West African genotype CHIKV-specific RT-PCR Nova Tec IgM ELISA | E1-antigen    | 91.2 for the ECSA genotype 89.4 for the overall genotypes                                                                     | 93.8 for the ECSA genotype 94.4 for the overall genotypes                                                                    |
|                                         | Jain J et al. 2018       | 2016      | 123 | 1-15 | IgM ELISA RT-PCR                                                               | E1-antigen    | 93.7                                                                                                                          | 95.5                                                                                                                         |
|                                         | Suzuki K et al. 2020     | 2014-2018 | 280 | ≤ 7  | IgM ELISA RT-PCR                                                               | E1-antigen    | 92                                                                                                                            | 100                                                                                                                          |
| <b>E1/E2- lateral flow antigen test</b> |                          |           |     |      |                                                                                |               |                                                                                                                               |                                                                                                                              |
|                                         | Reddy A et al. 2020      | ND        | 189 | 1-5  | RT-PCR                                                                         | E1/E2-antigen | 62.5-100 for Honduras' AB combination A<br>62.5-100 for Honduras' AB combination B<br>77.7-100 for Colombia' AB combination B | 92.3-100 for Honduras' AB combination A<br>75-100 for Honduras' AB combination B<br>85.7-100 for Colombia's AB combination B |

498  
499  
500  
501  
502

503

504
